# Supplementary material
Source: Springer Nature journal article supplement (https://www.springermedizin.de/resource/supplementary/12936_2011_1857_MOESM17_ESM.pdf/9541930)

**A**cir subfamily 1 - *AluI*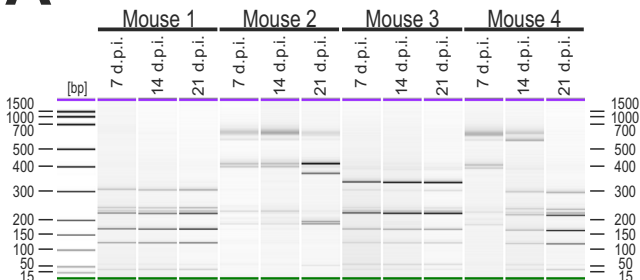**B**cir subfamily 2 - *AluI*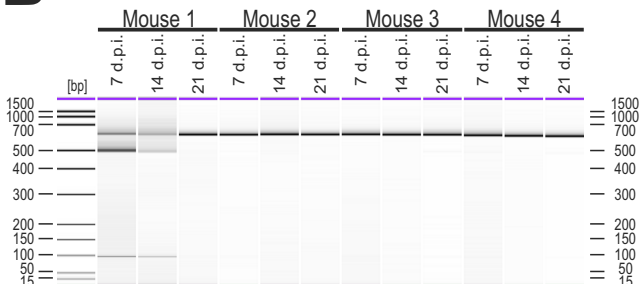cir subfamily 2 - *XapI*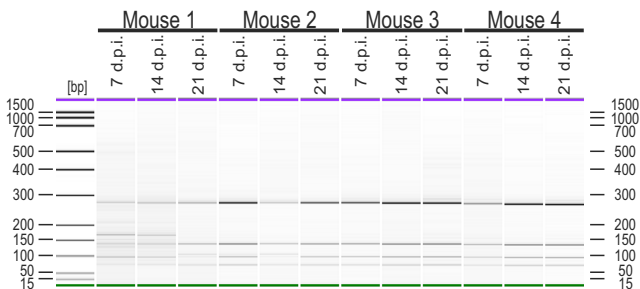

Supplement: MOESM17 [file 9541930]
